# Supplementary material
Source: Research Square preprint supplement (doi:10.21203/rs.3.rs-9218510/v1)
Supplement: Supplementary file 1 [file 58af12c57c8c184ff59b1049.docx]

**Supplementary Material**

**Defect–Interface Engineering of Machine Learning-Enhanced Au–VSe2–MXene Nanocomposites with Tuned Electronic States for Trace Antibiotic Sensing**

Ezhil Viliana*, Sujina Tamangb, Elangovan Sarathkumarc, Ramapurath S. Jayasreec , Yun Suk Huhb*, Young-Kyu Hana*

*aDepartment of Energy and Materials Engineering, Dongguk University-Seoul, Seoul 04620, Republic of Korea.*

*bDepartment of Biological Engineering, Inha University, Incheon 22212, Republic of Korea.*

*cDivision of Biophotonics and Imaging, Biomedical Technology Wing, Sree Chitra Tirunal Institute for Medical Sciences and Technology, Poojappura, Thiruvananthapuram, 695012, Kerala, India*

**Corresponding authors*:**

*Department of Energy and Materials Engineering, Dongguk University-Seoul, Seoul 04620, Republic of Korea. E-mail: ezhil2040@dongguk.edu (*E.Vilian*)*

*Department of Biological Engineering, Inha University, Incheon 22212, Republic of Korea. E-mail: yunsuk.huh@inha.ac.kr (Y.S. Huh)*

*Department of Energy and Materials Engineering, Dongguk University-Seoul, Seoul 04620, Republic of Korea. E-mail: ykenergy@dongguk.edu (Y.-K. Han)*

**
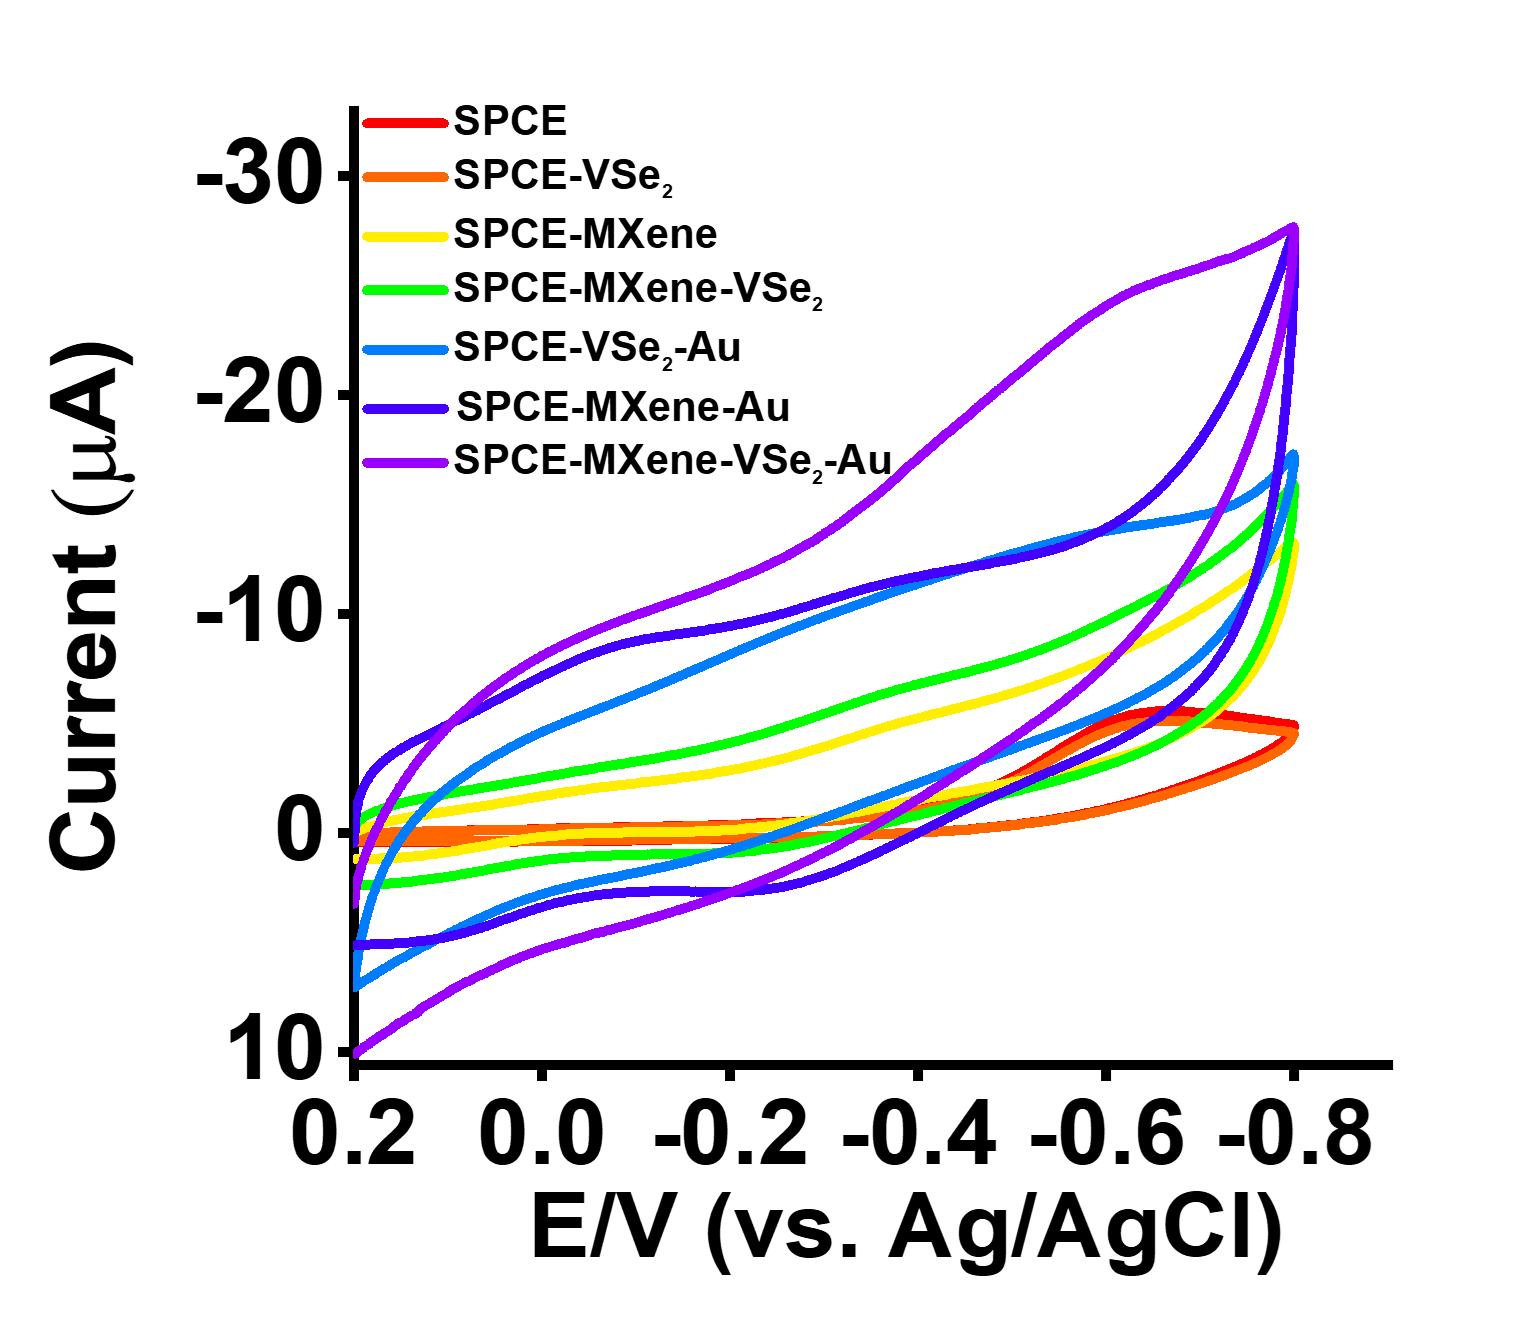
**

**Figure S1**.CV profiles obtained at various composites modified SPCE in the 0.05 M PB solutions (pH = 7.0) without 500 µM FZD.


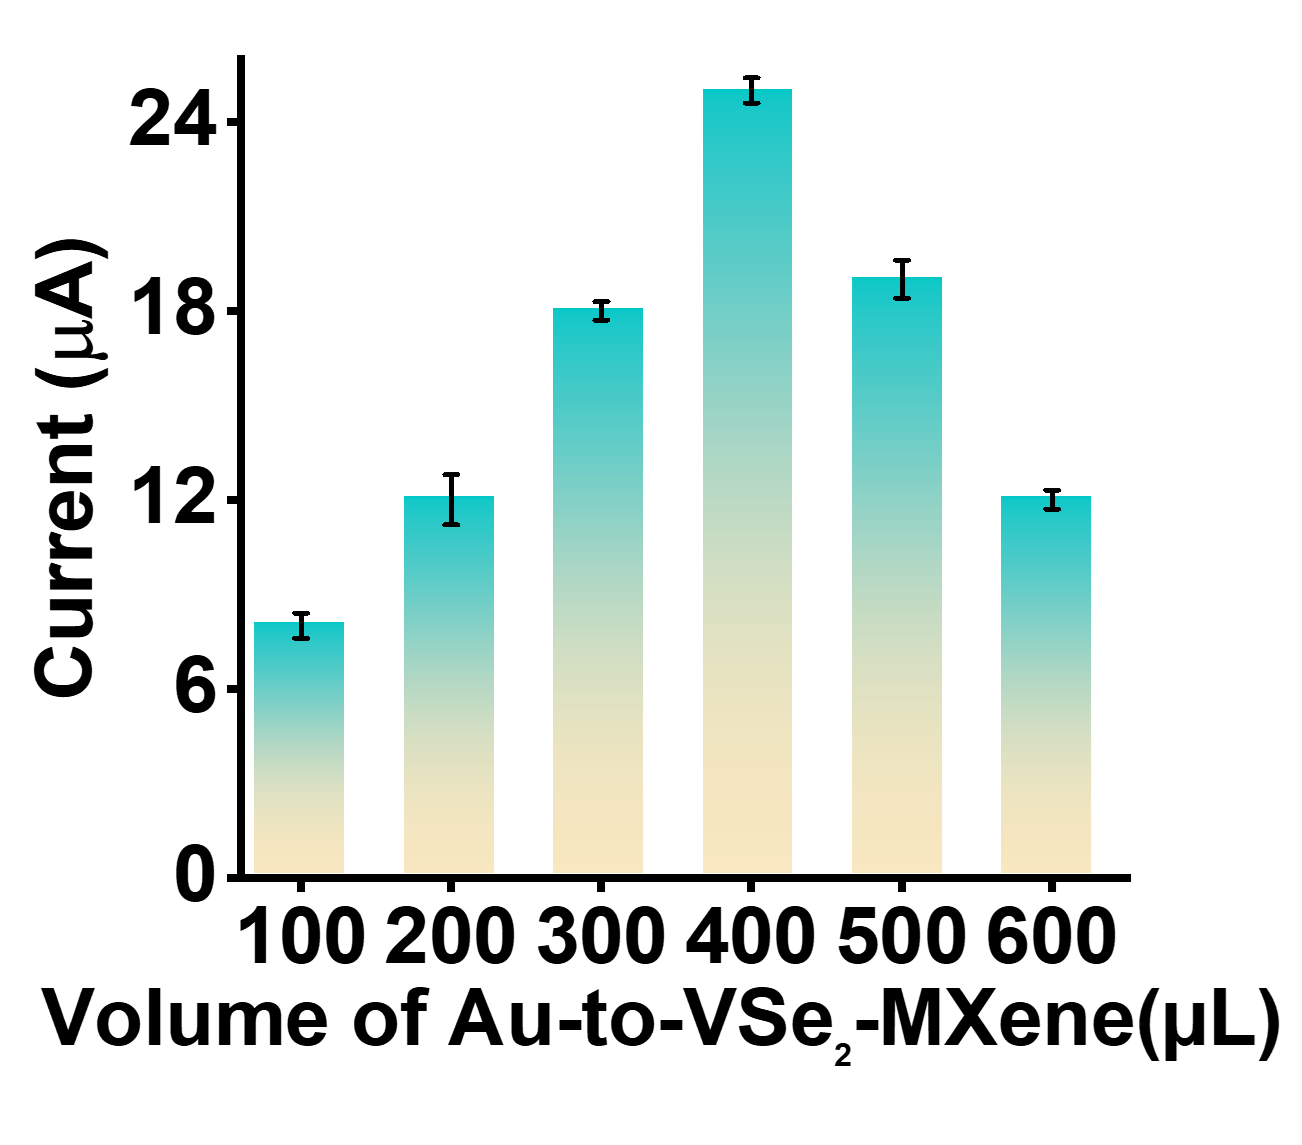


**Figure S2**.Electrochemical activity of the Au-VSe2-MXene composite-modified SPCE recorded using different Au precursor volumes (100-600 μL) in 0.05 M phosphate buffer (pH 7.0) containing 500 µM FZD.


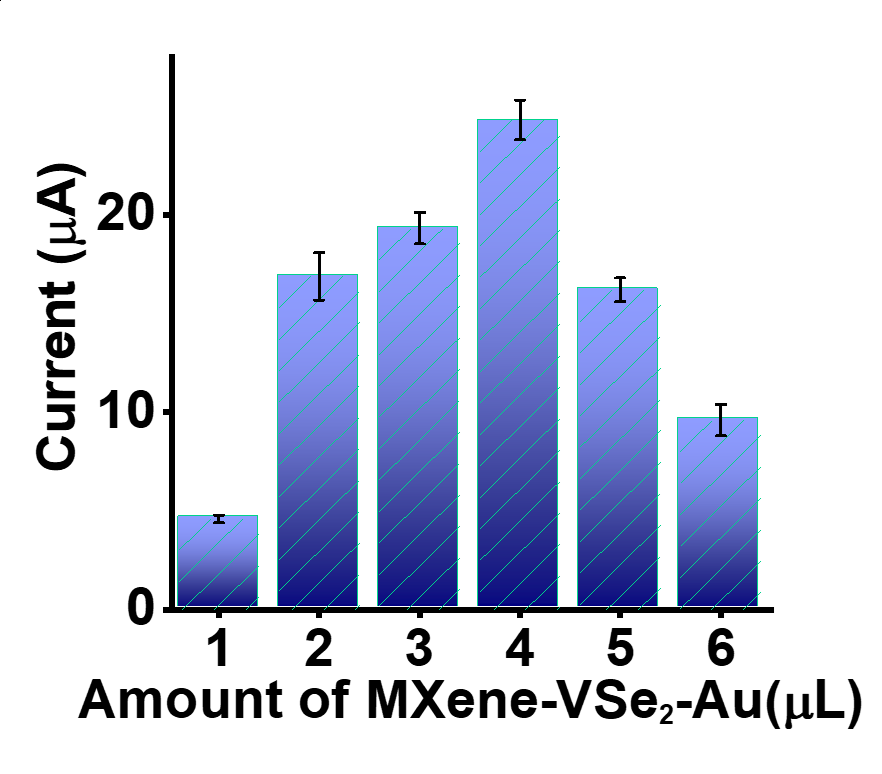


**Figure S3.** Electrochemical activity of the Au-VSe2-MXene composite-modified SPCE at different composite loadings (1-6 μL) in 0.05 M phosphate buffer (pH 7.0) containing 500 µM FZD.


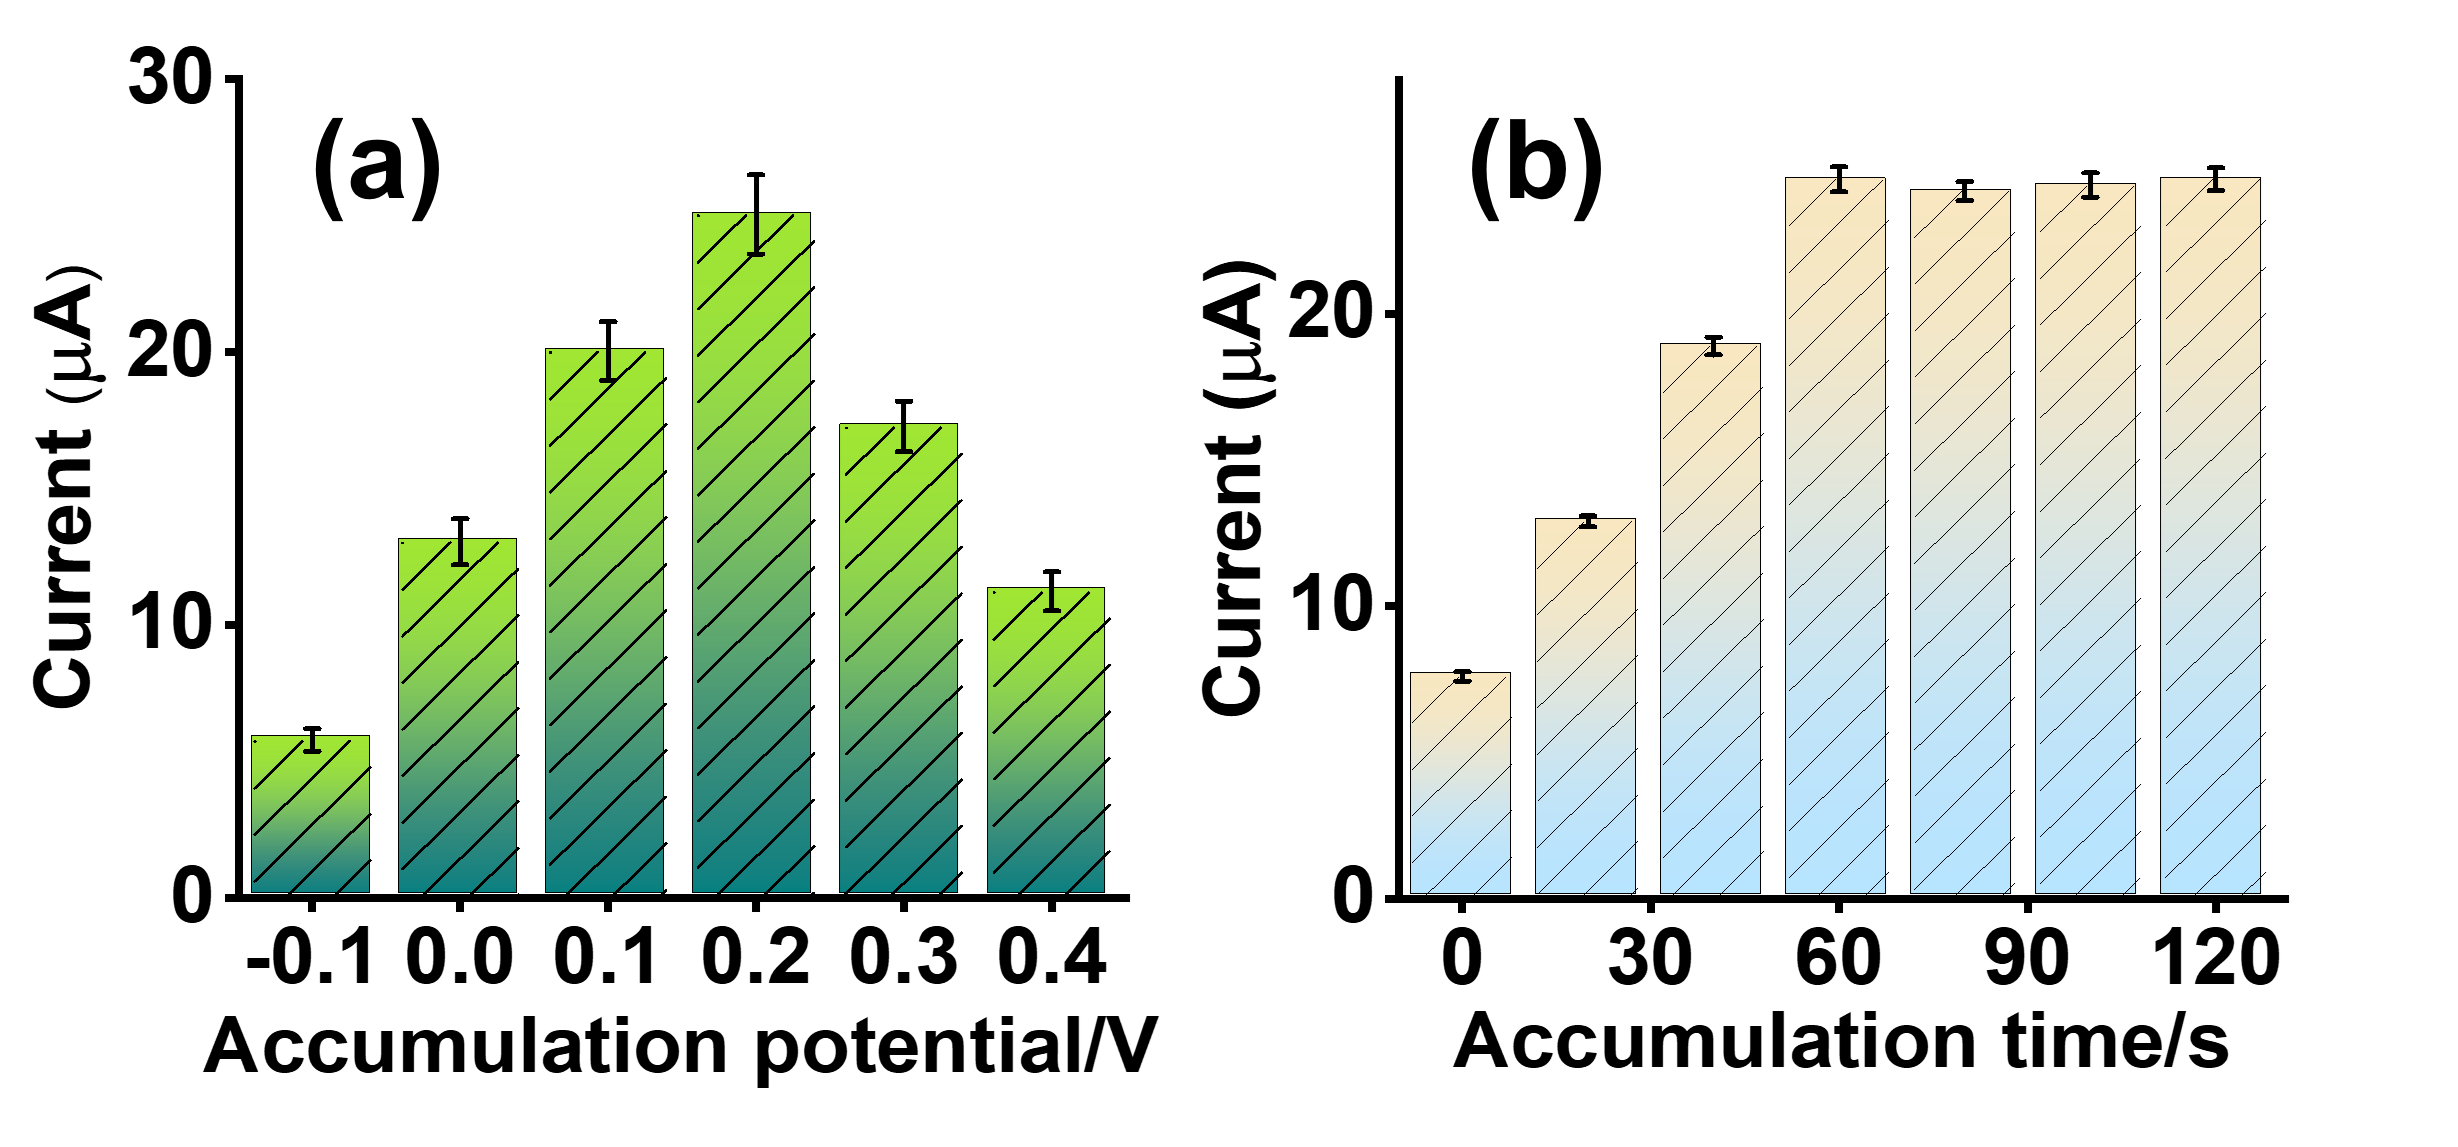


**Figure S4**. Impact of accumulation potential and accumulation time on the response of Au-VSe2-MXene composites modified SPCE in the 0.05 M PB solutions (pH = 7.0) containing 100 nM FZD.


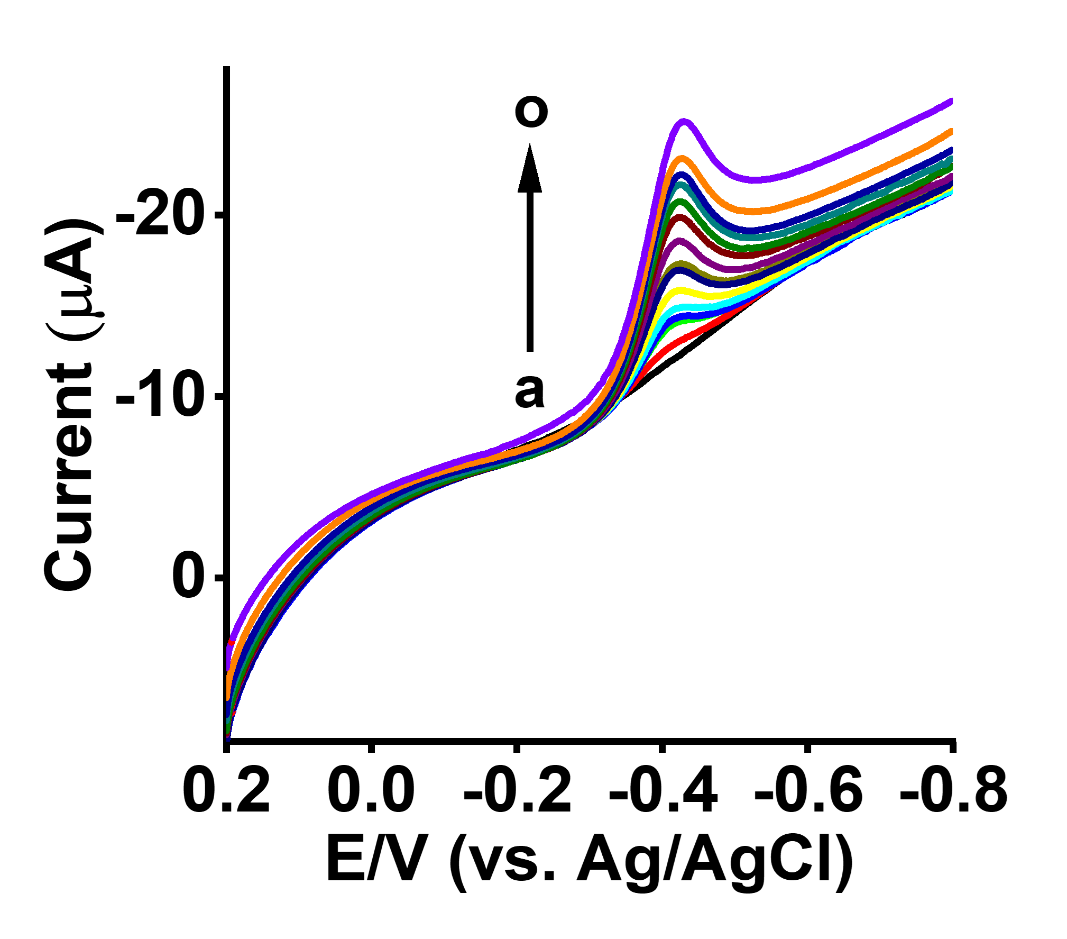


**Figure S5**. LSV profiles for Au-VSe2-MXene-SPCE in 0.05 M PBS in the presence of different concentrations of FZD at a scan speed of 30 mV/s.


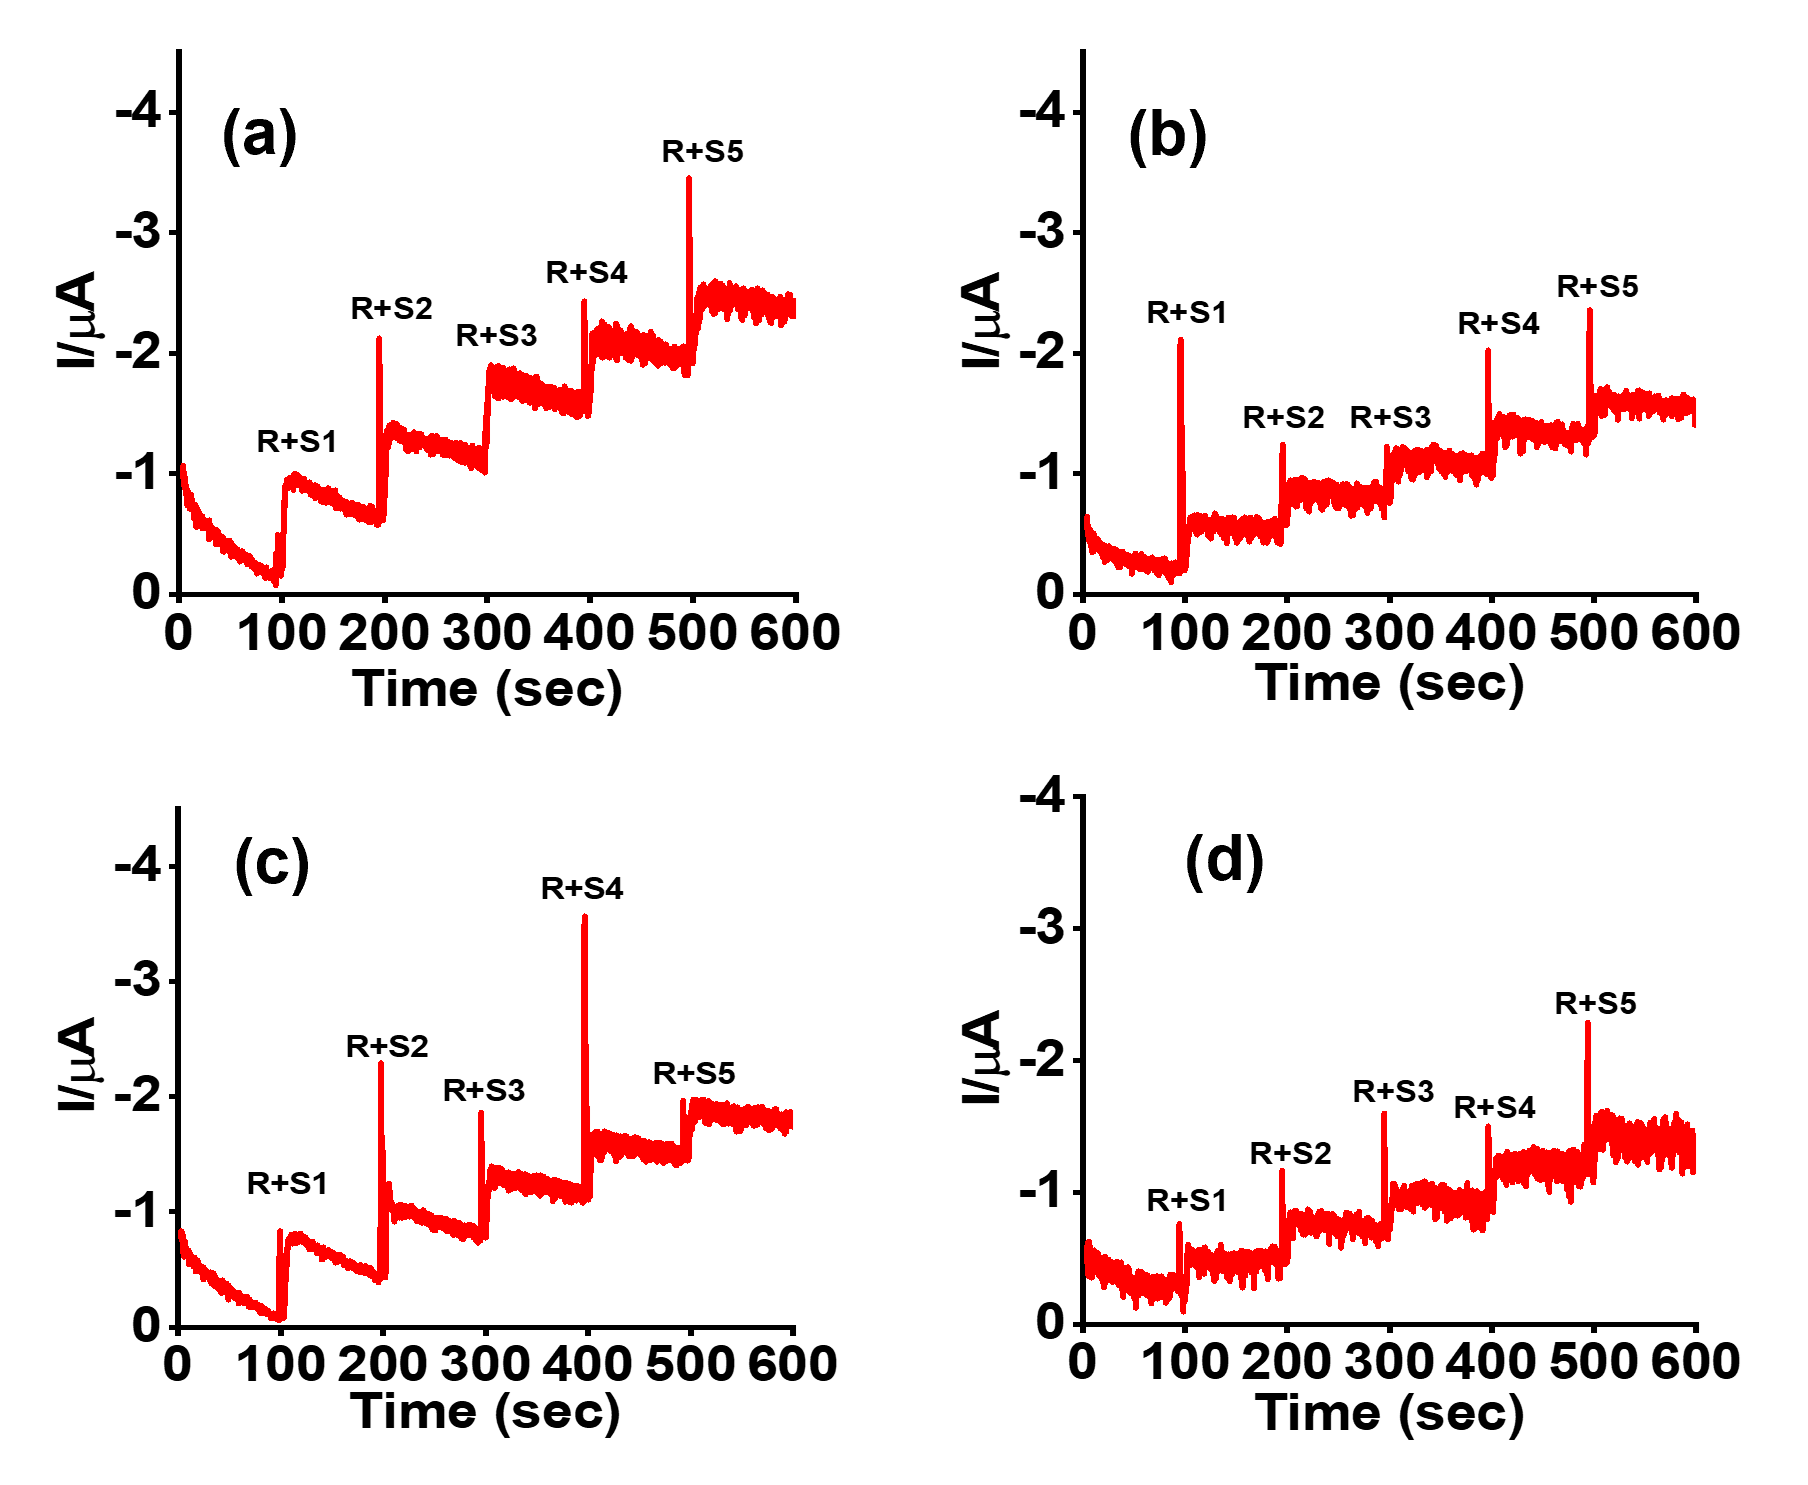


**Figure S6**. (a-d) Amperometric i-t response profiles of the Au-VSe2-MXene-SPCE sensor for successive FZD additions in four environmental water matrices: hospital wastewater, pond water, river water, and lake water (in N2‑saturated 0.05 M PBS, pH 7).


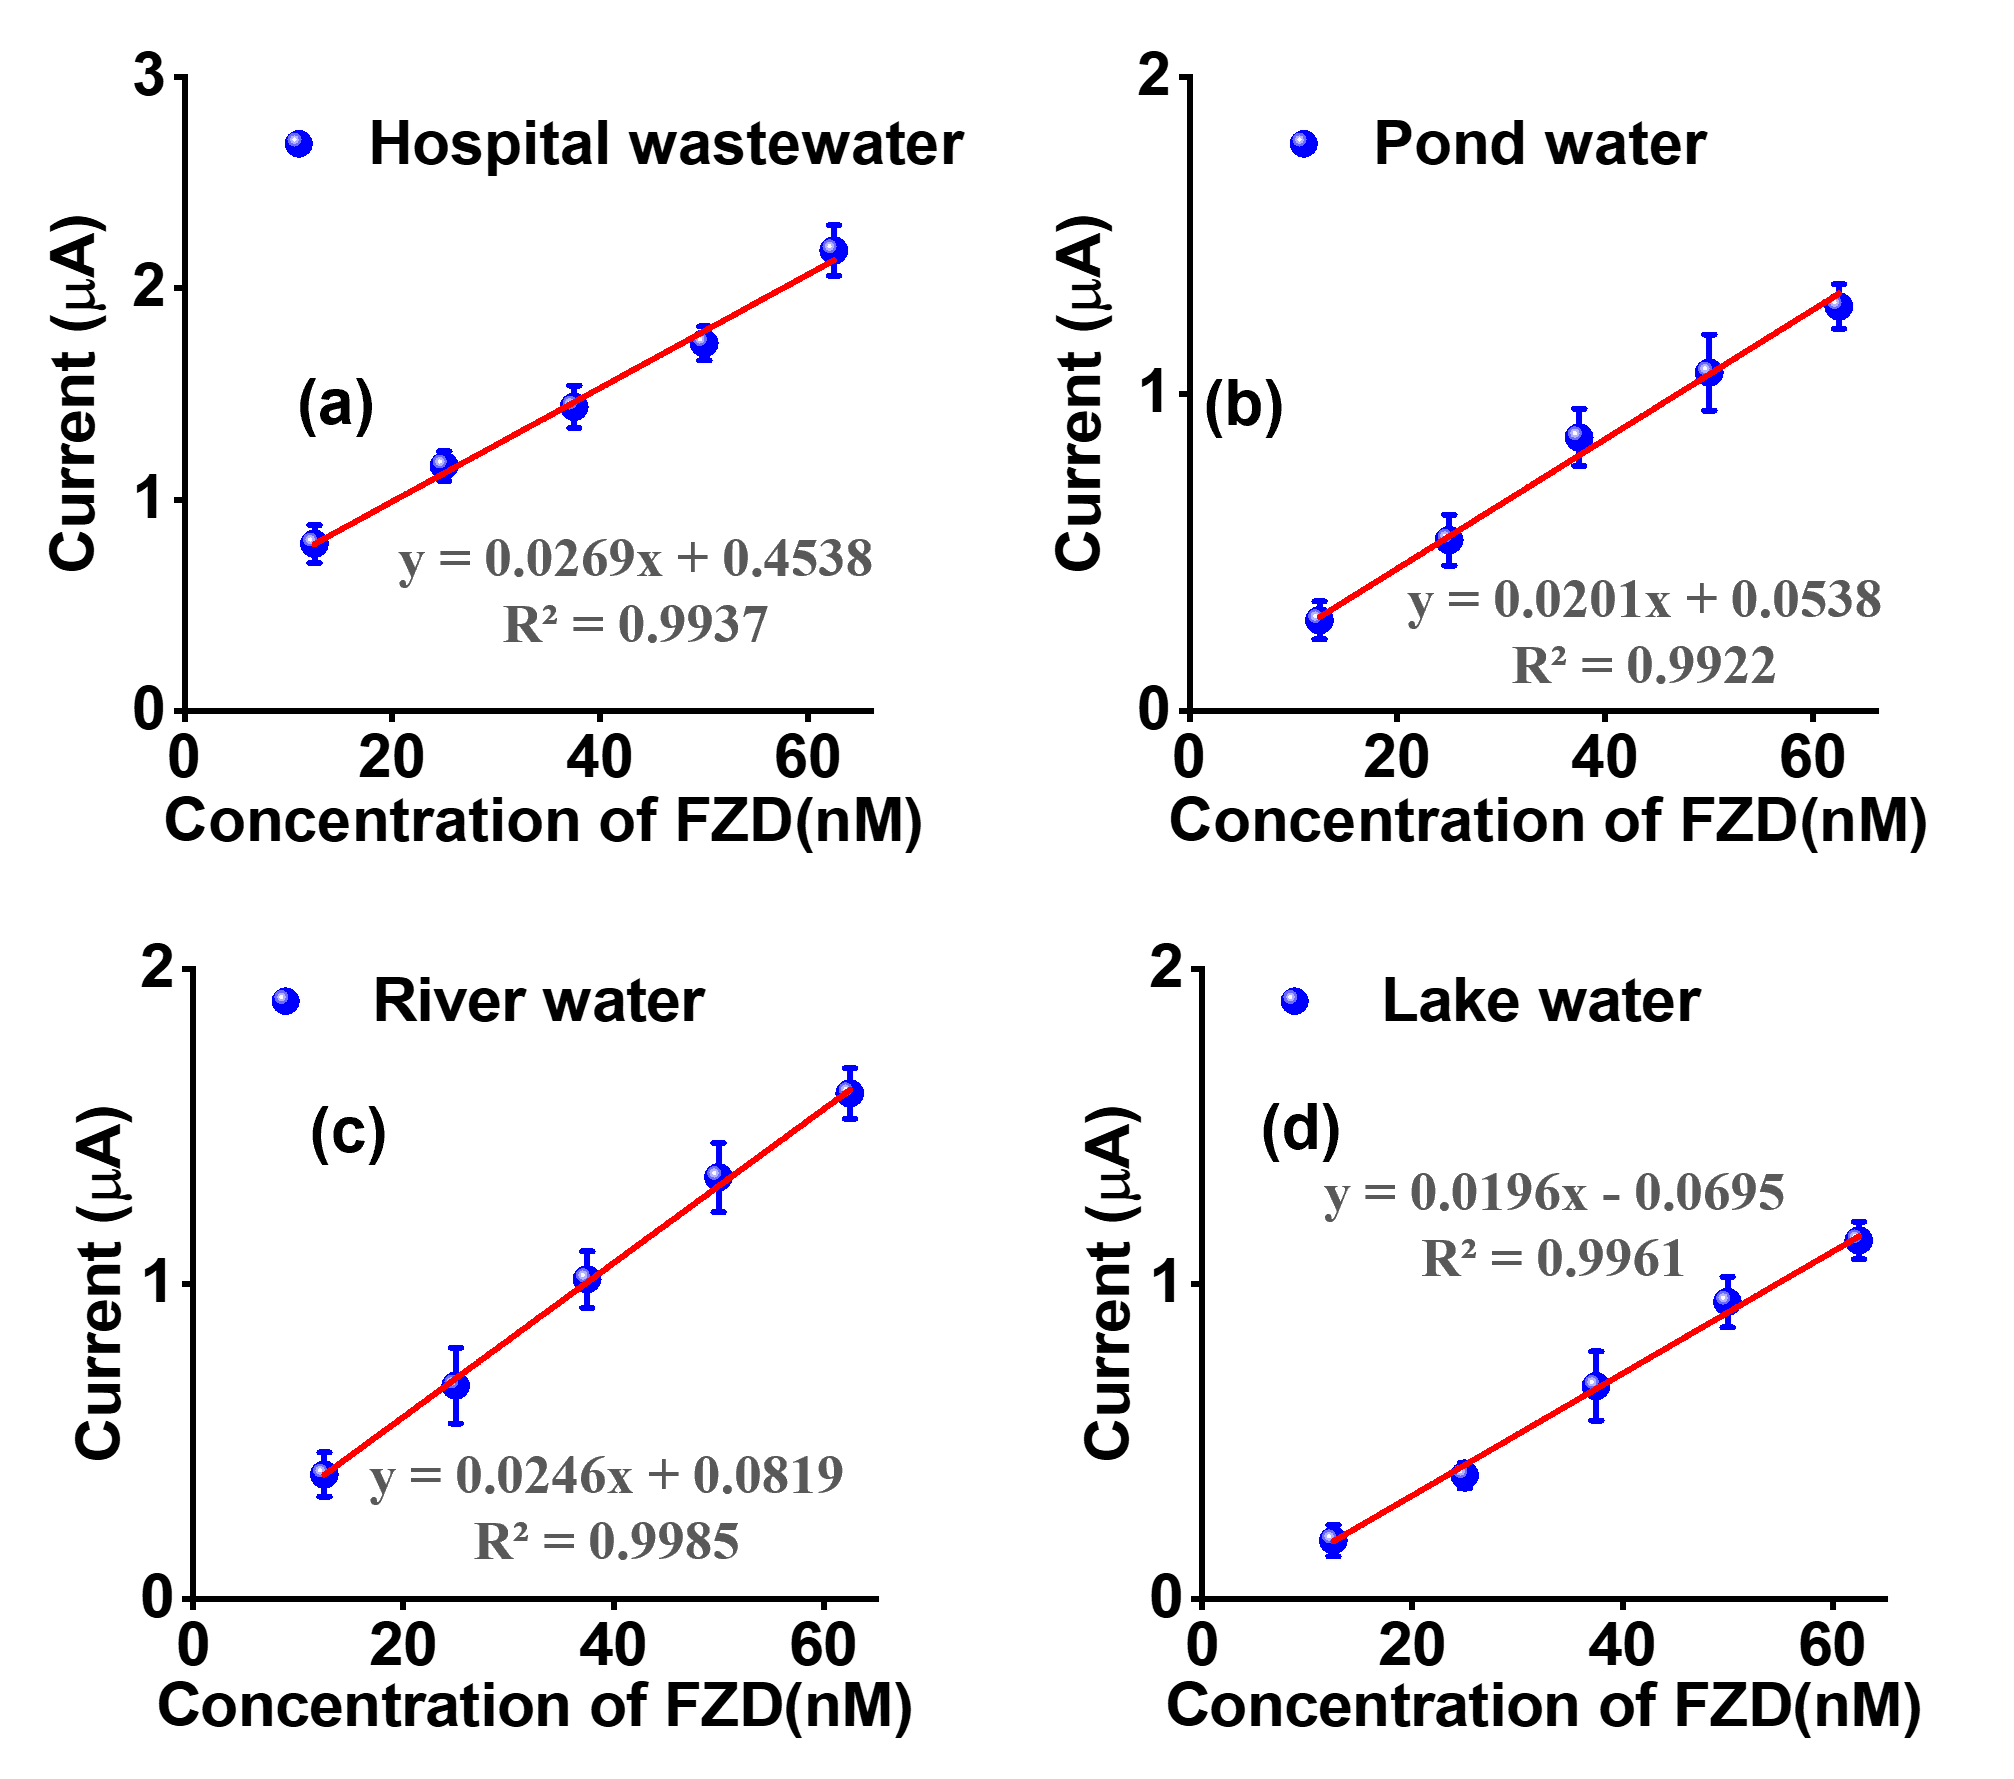


**Figure S7**. Linear calibration of FZD concentration vs. cathodic peak current for the Au‑VSe2‑MXene/SPCE sensor in N2‑saturated PBS (pH 7), applied to four environmental water matrices: hospital wastewater, pond water, river water, and lake water.


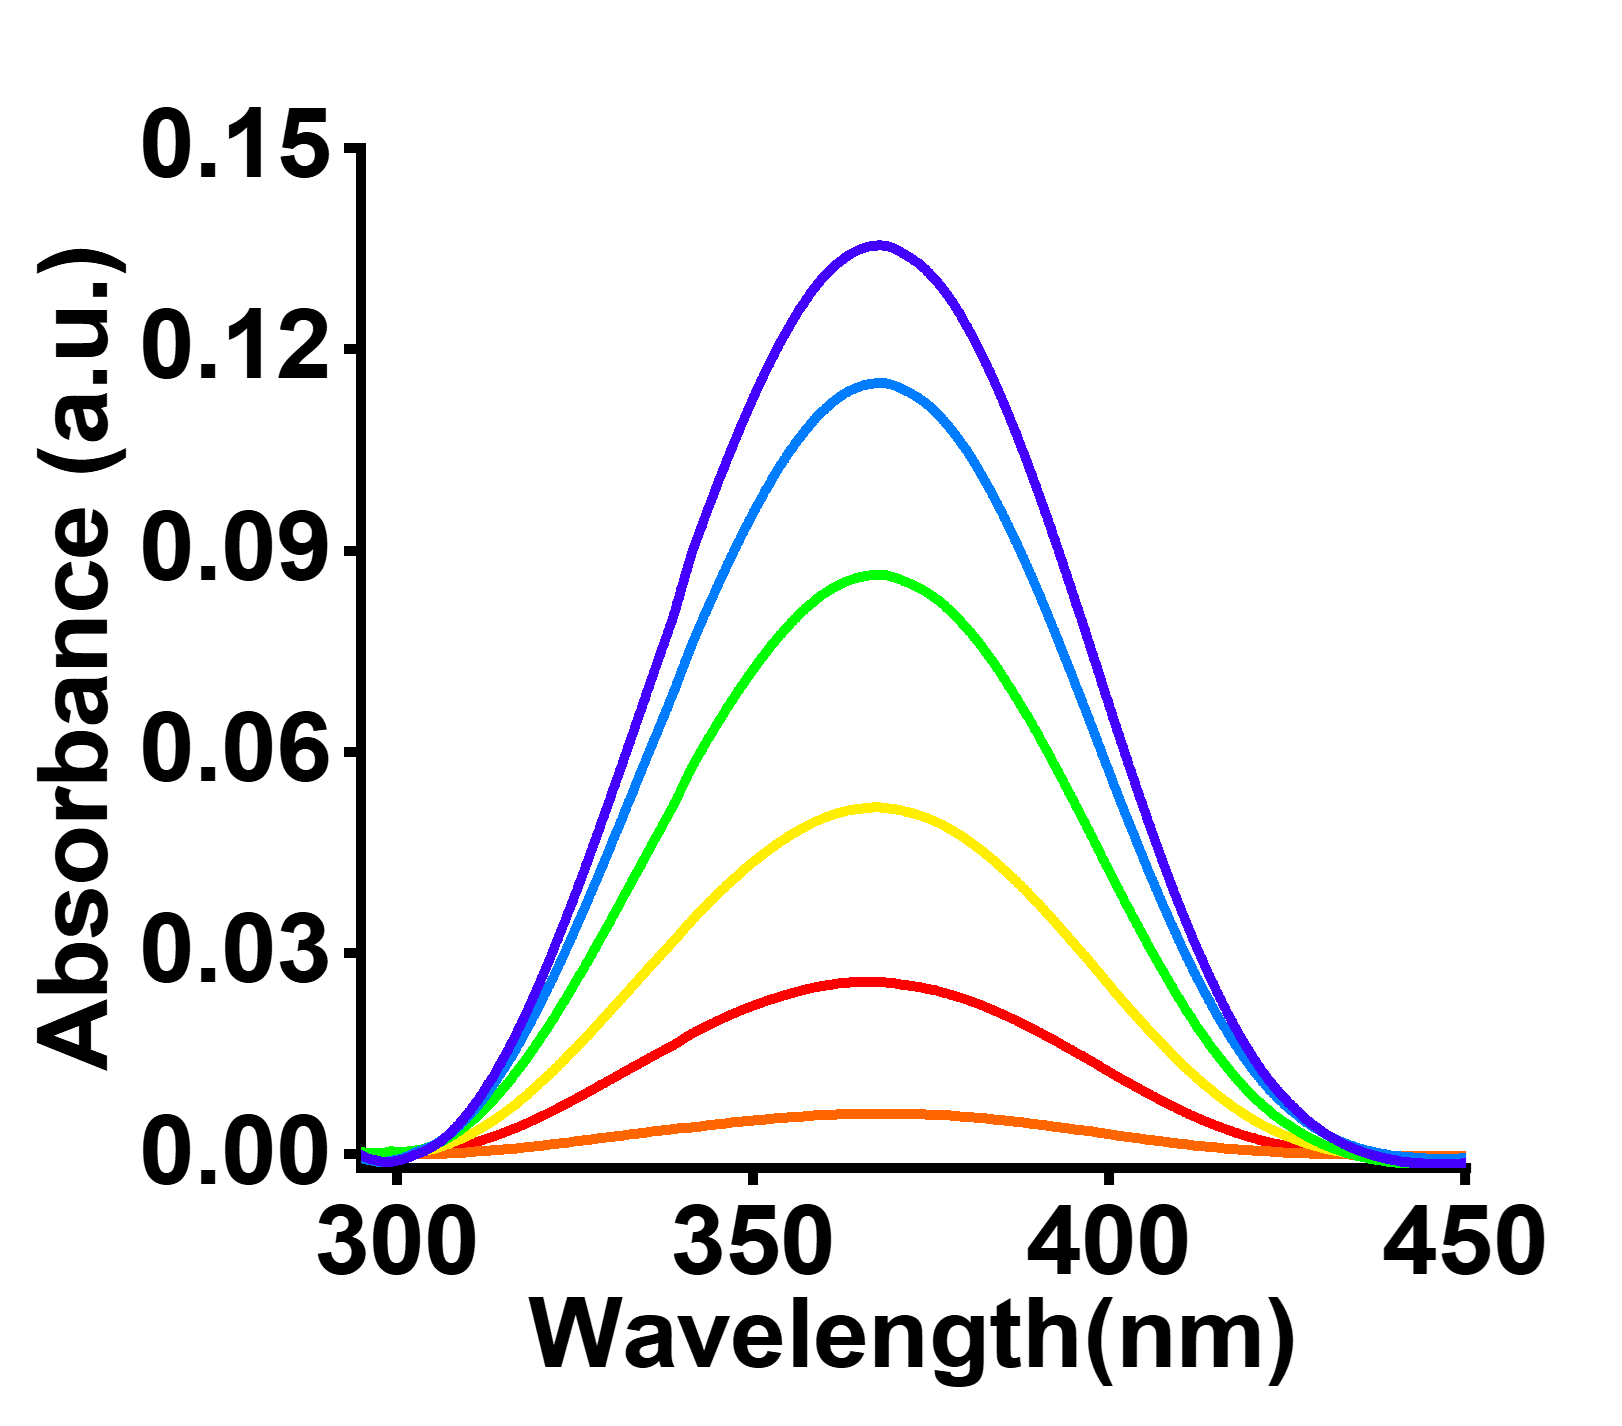


**Figure S8**. UV-vis spectra of different FZD concentrations (12, 24, 37, 49, and 62 nM).


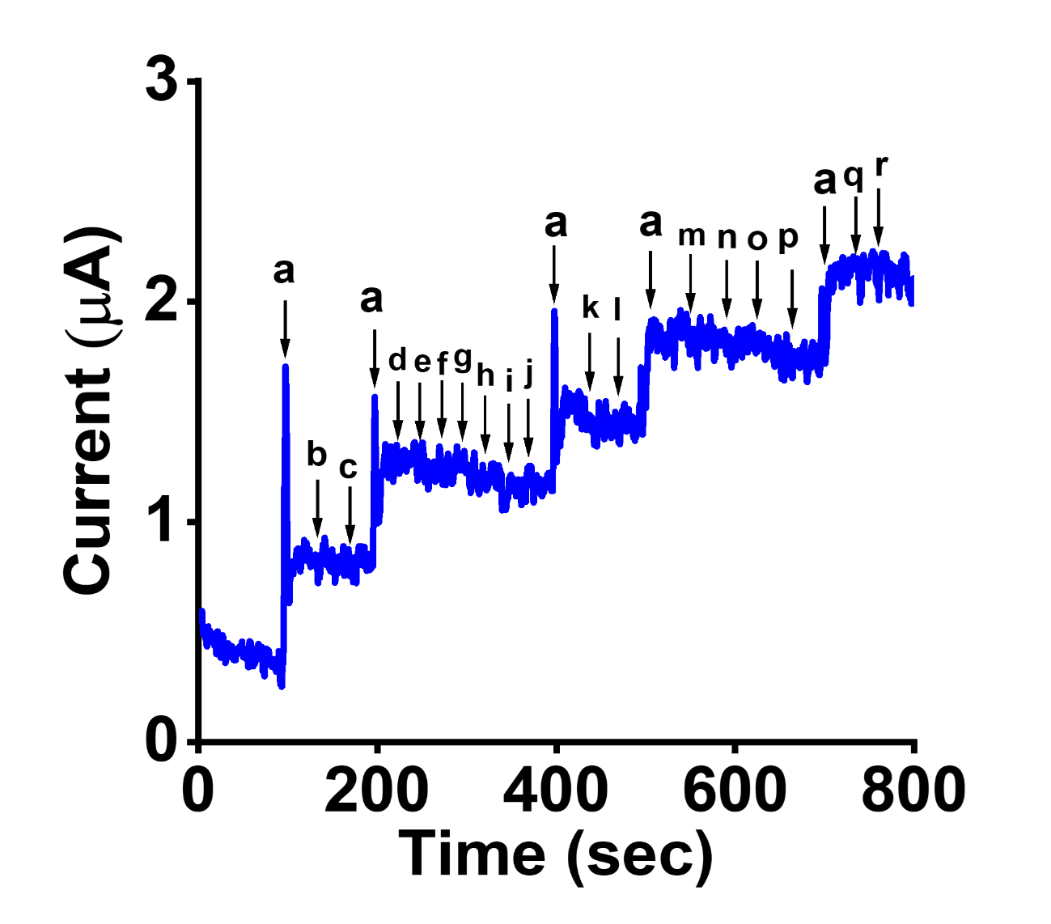


**Figure S9**. Amperometric responses of Au-VSe2-MXene-RDE at -0.4 V to incremental injections of (a) FZD in the presence of (b-d) pharmaceutical drugs (metronidazole, nitrofurantoin, and chloramphenicol), (e-h) nitro compounds (nitrobenzene, catechol, hydroquinone and 4-nitrophenol),(i-m) interfering metal ions (Cd2+,K+,Pb2+, NO3- and SO42-), (n-p) biological compounds (UA, DA,AA), (q-r) organic interfering species (nutrient agar and casein-peptone).

**
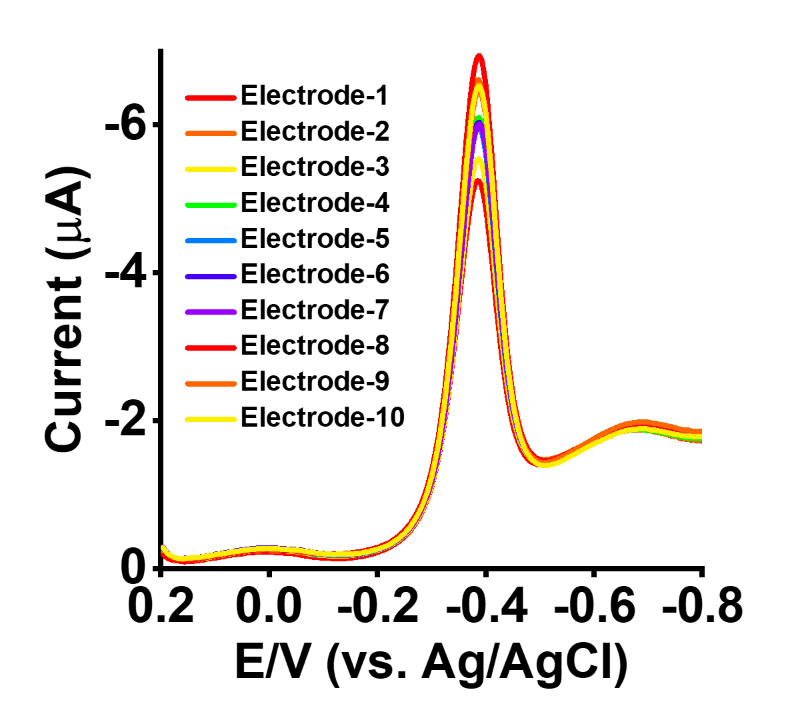
**

**Figure S10**. Reproducibility of Au-VSe2-MXenecomposites modified SPCE in the 0.05 M PB solutions (pH = 7.0) containing 20 nM FZD.


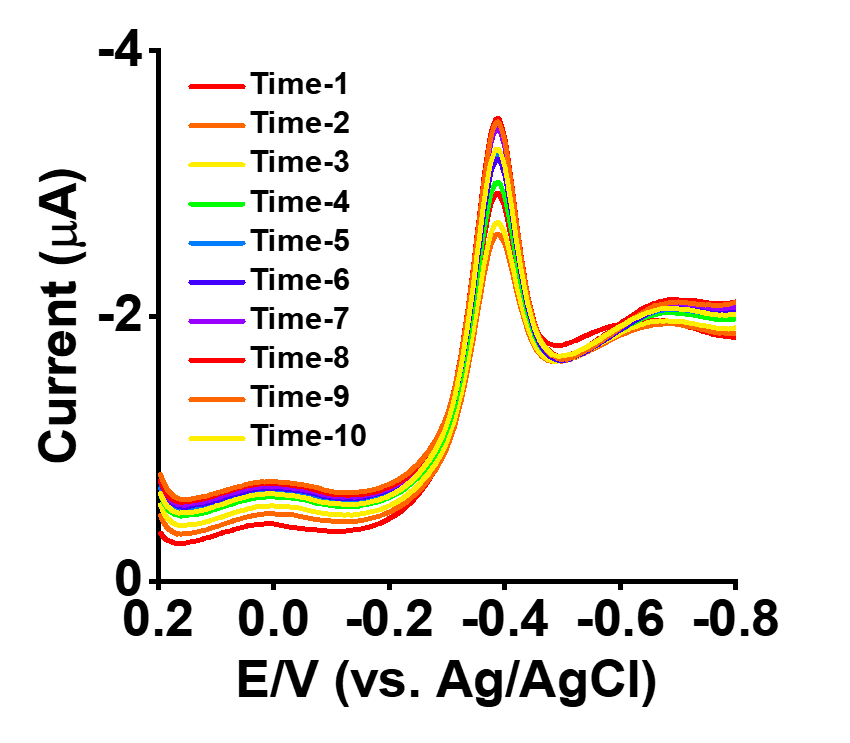


**Figure S11**. Repeatability of Au-VSe2-MXenecomposites modified SPCE in the 0.05 M PB solutions (pH = 7.0) containing 20 nM FZD.

**
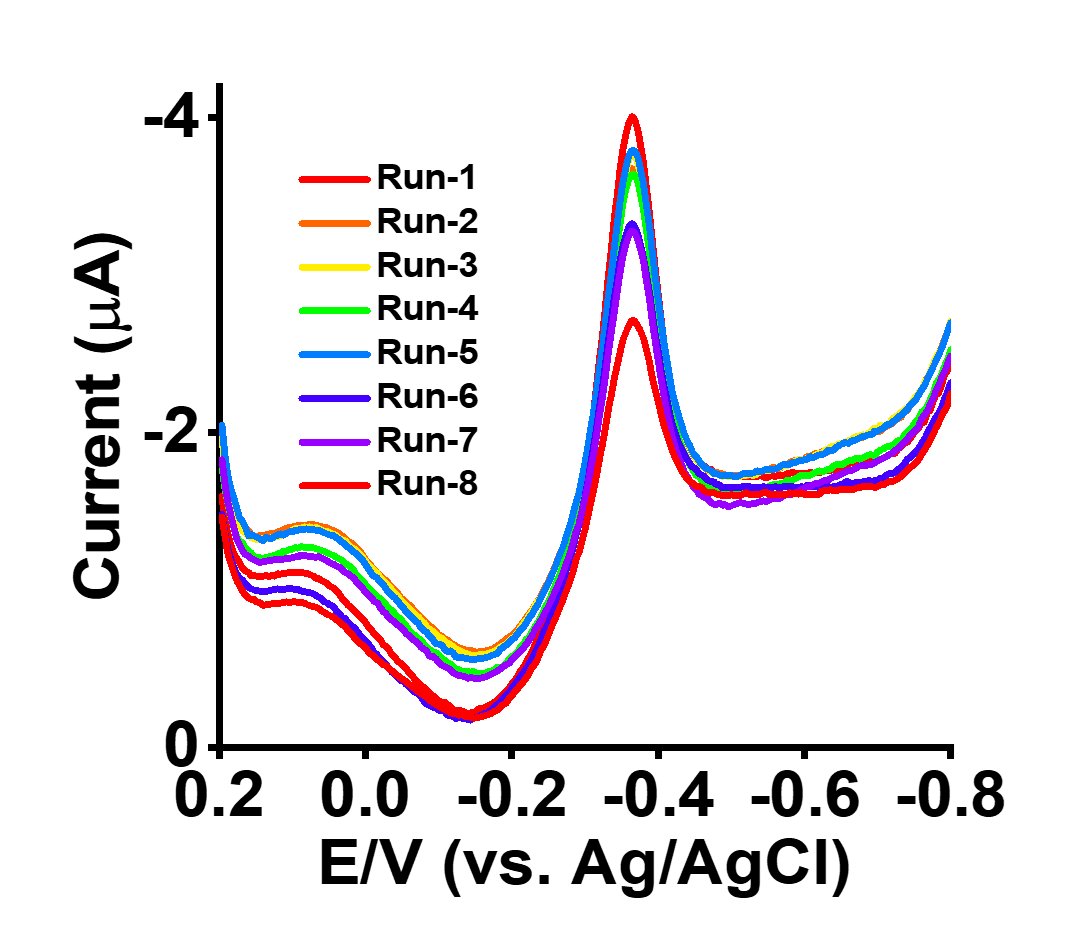
**

**Figure S12**. Reusability of Au-VSe2-MXene composites modified SPCE in the 0.05 M PB solutions (pH = 7.0) containing 20 nM FZD.


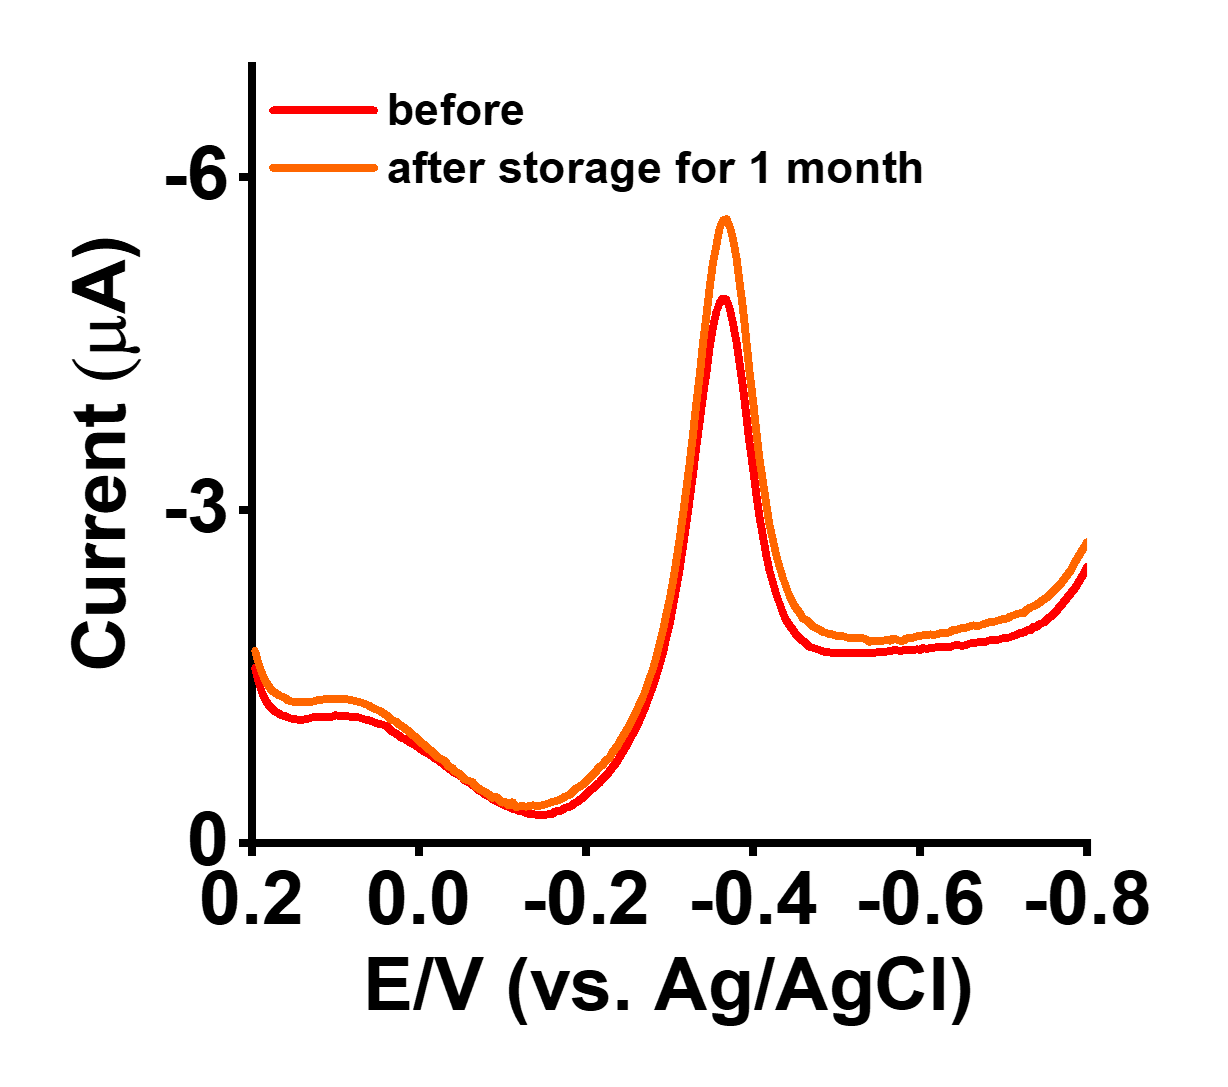


**Figure S13**.Sability of Au-VSe2-MXene composites modified SPCE in the 0.05 M PB solutions (pH = 7.0) contain 20 nM FZD.


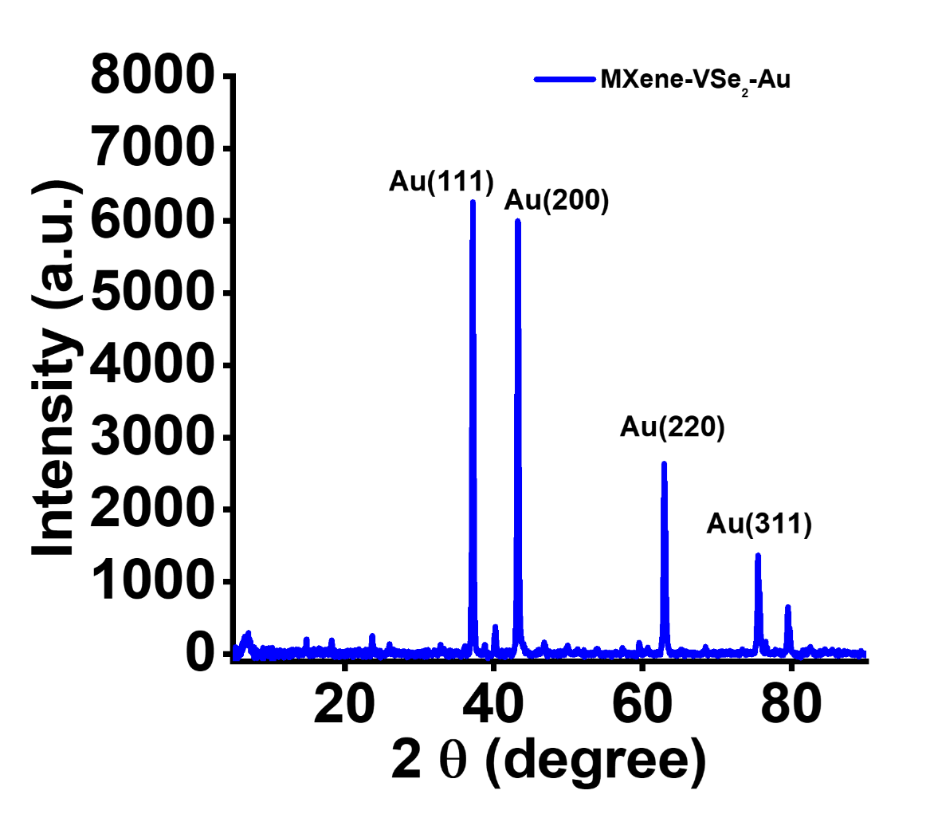


**Figure S14**.XRD spectra of Au-VSe2-MXene-SPCE electrode after stability tests.


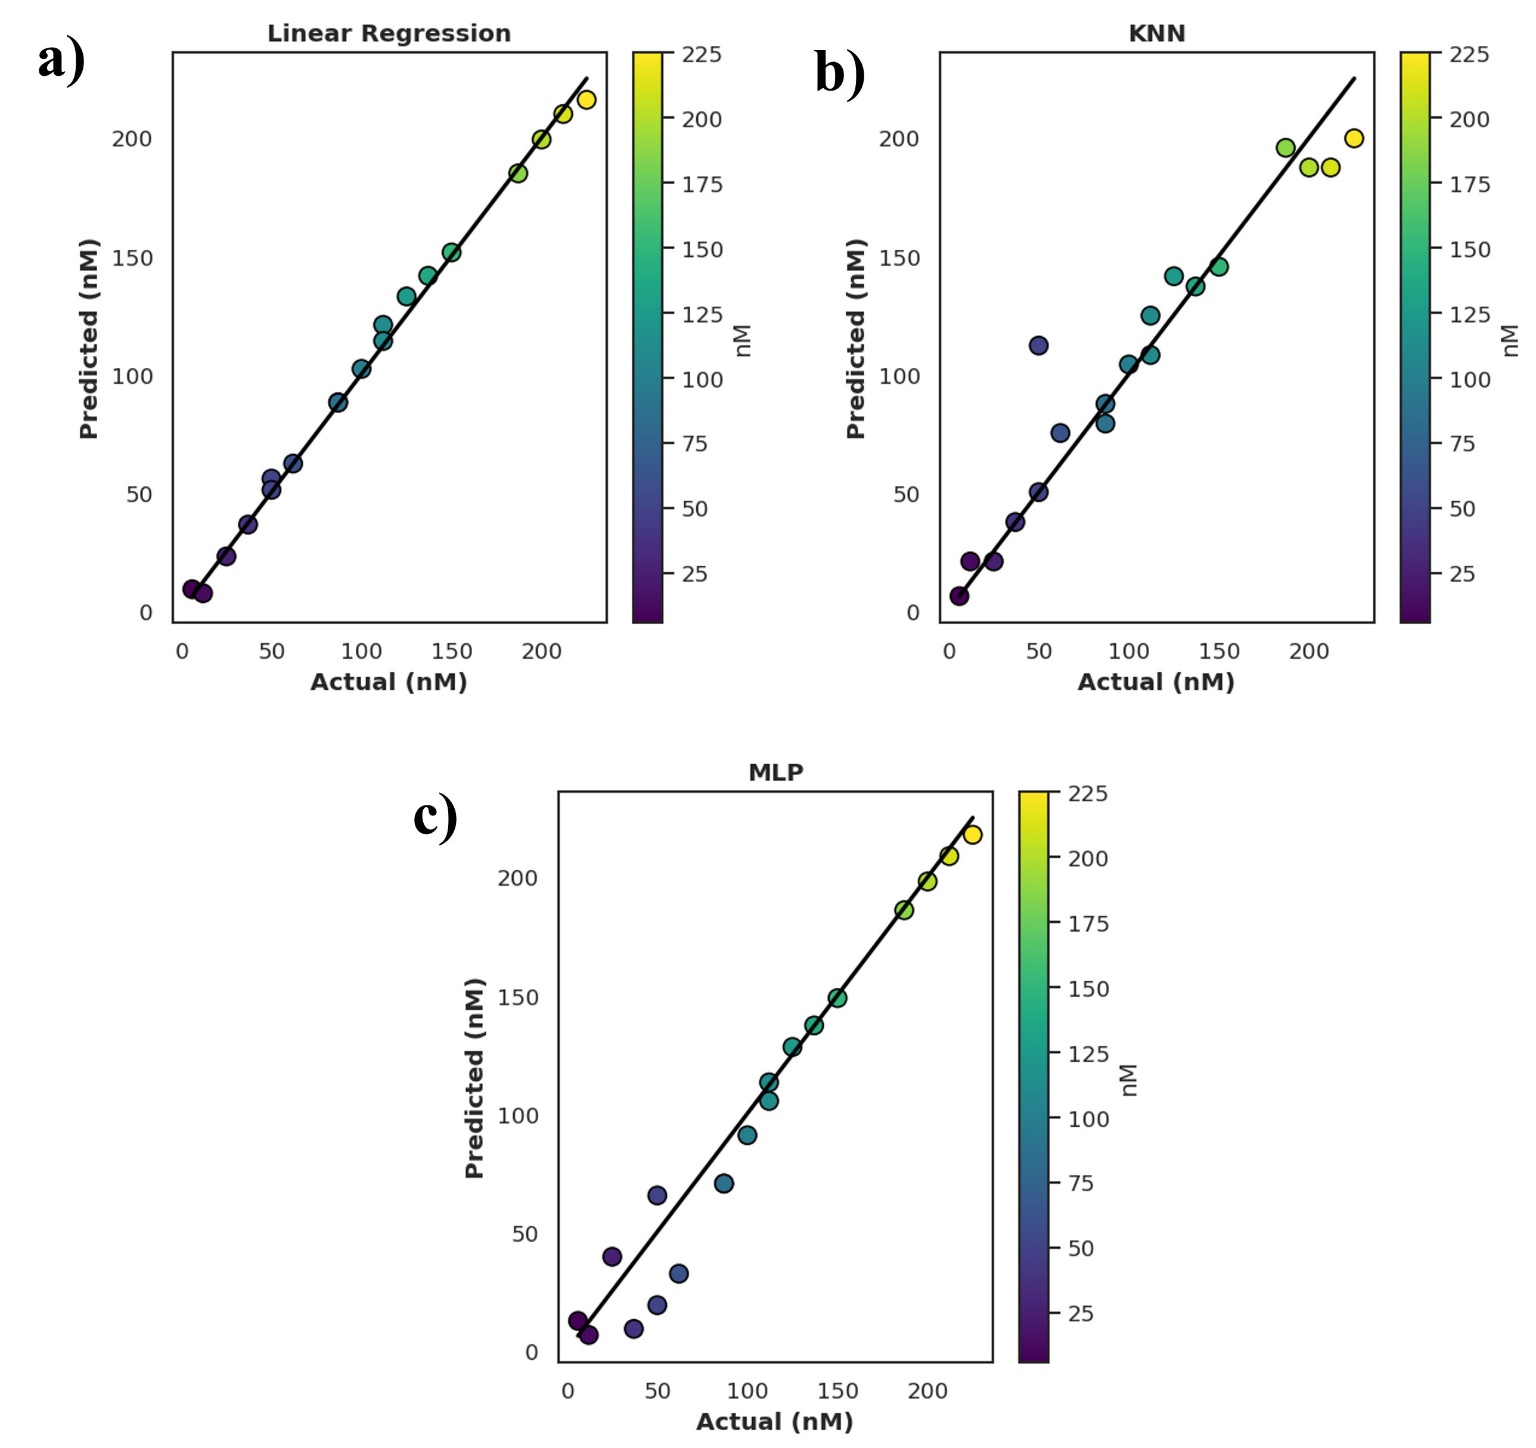


**Figure S15**. (a-c) Predicted versus actual concentration plots obtained using Linear Regression, KNN, and MLP models.


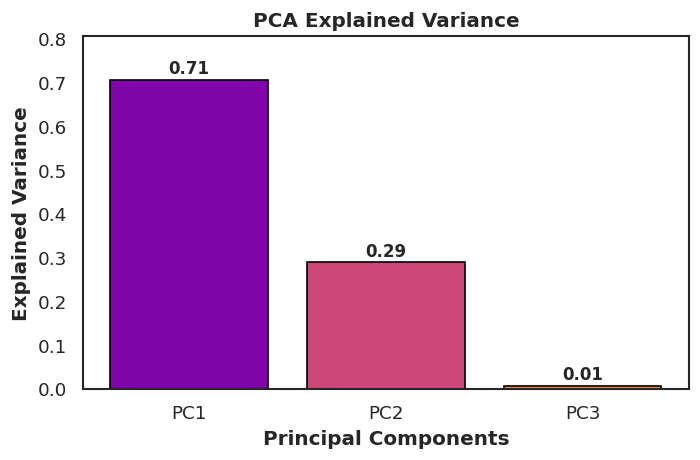


**Figure S16**. PCA explained variance distribution.


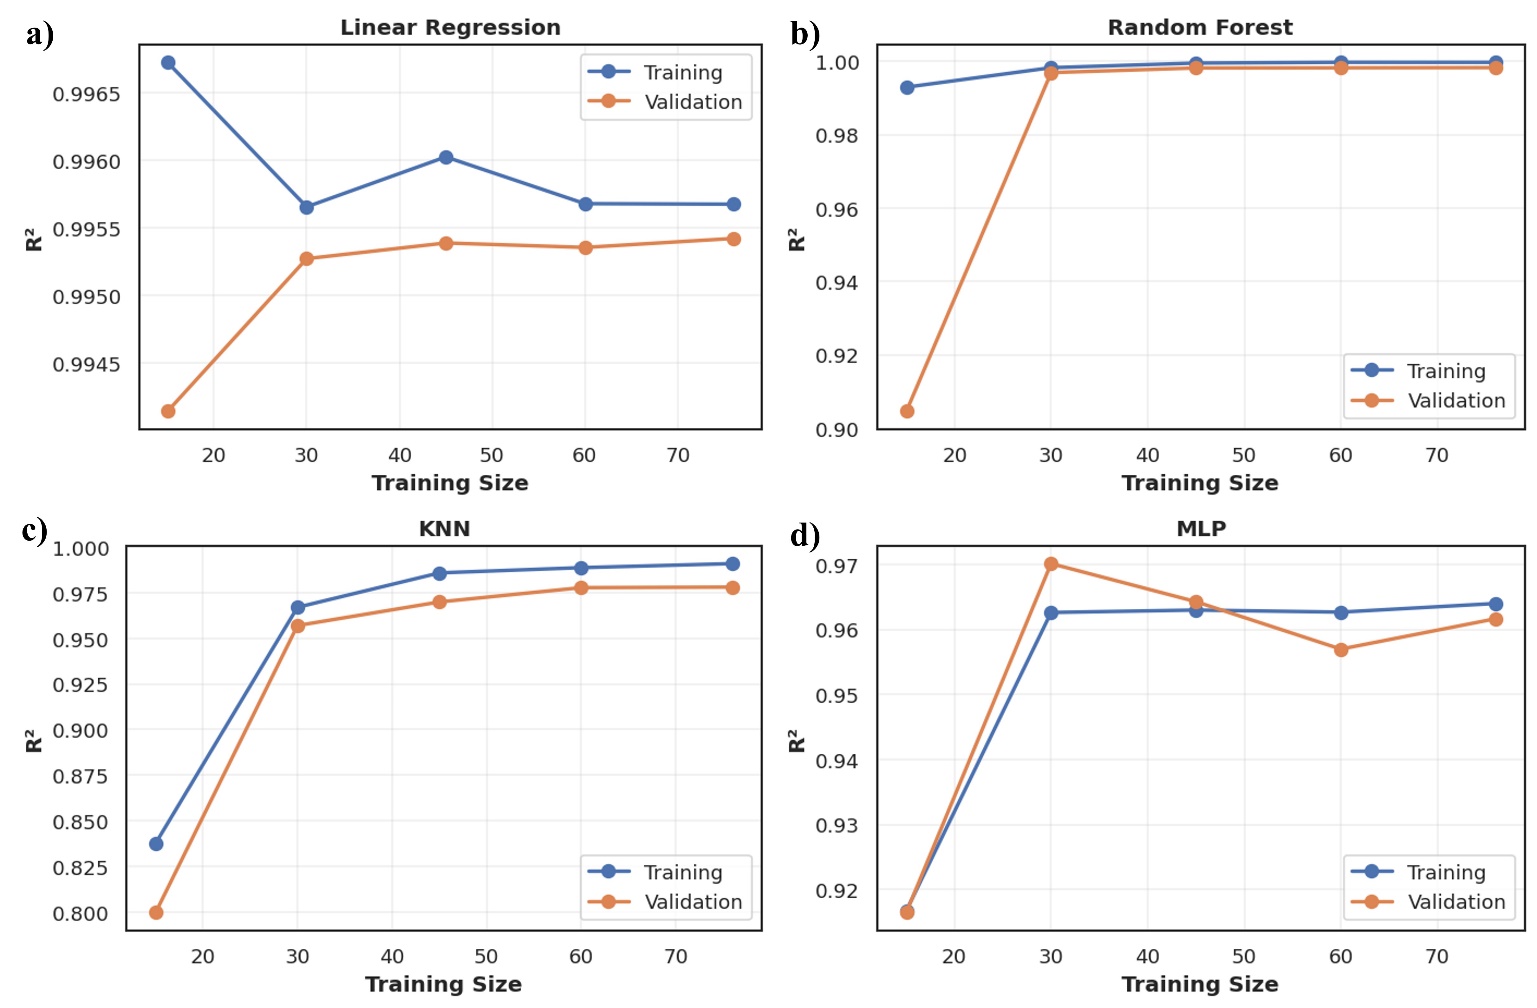


**Figure. S17.** Training and validation curves for (a) Linear Regression, (b) Random Forest, (c) KNN, and (d) MLP models showing model generalization behaviour


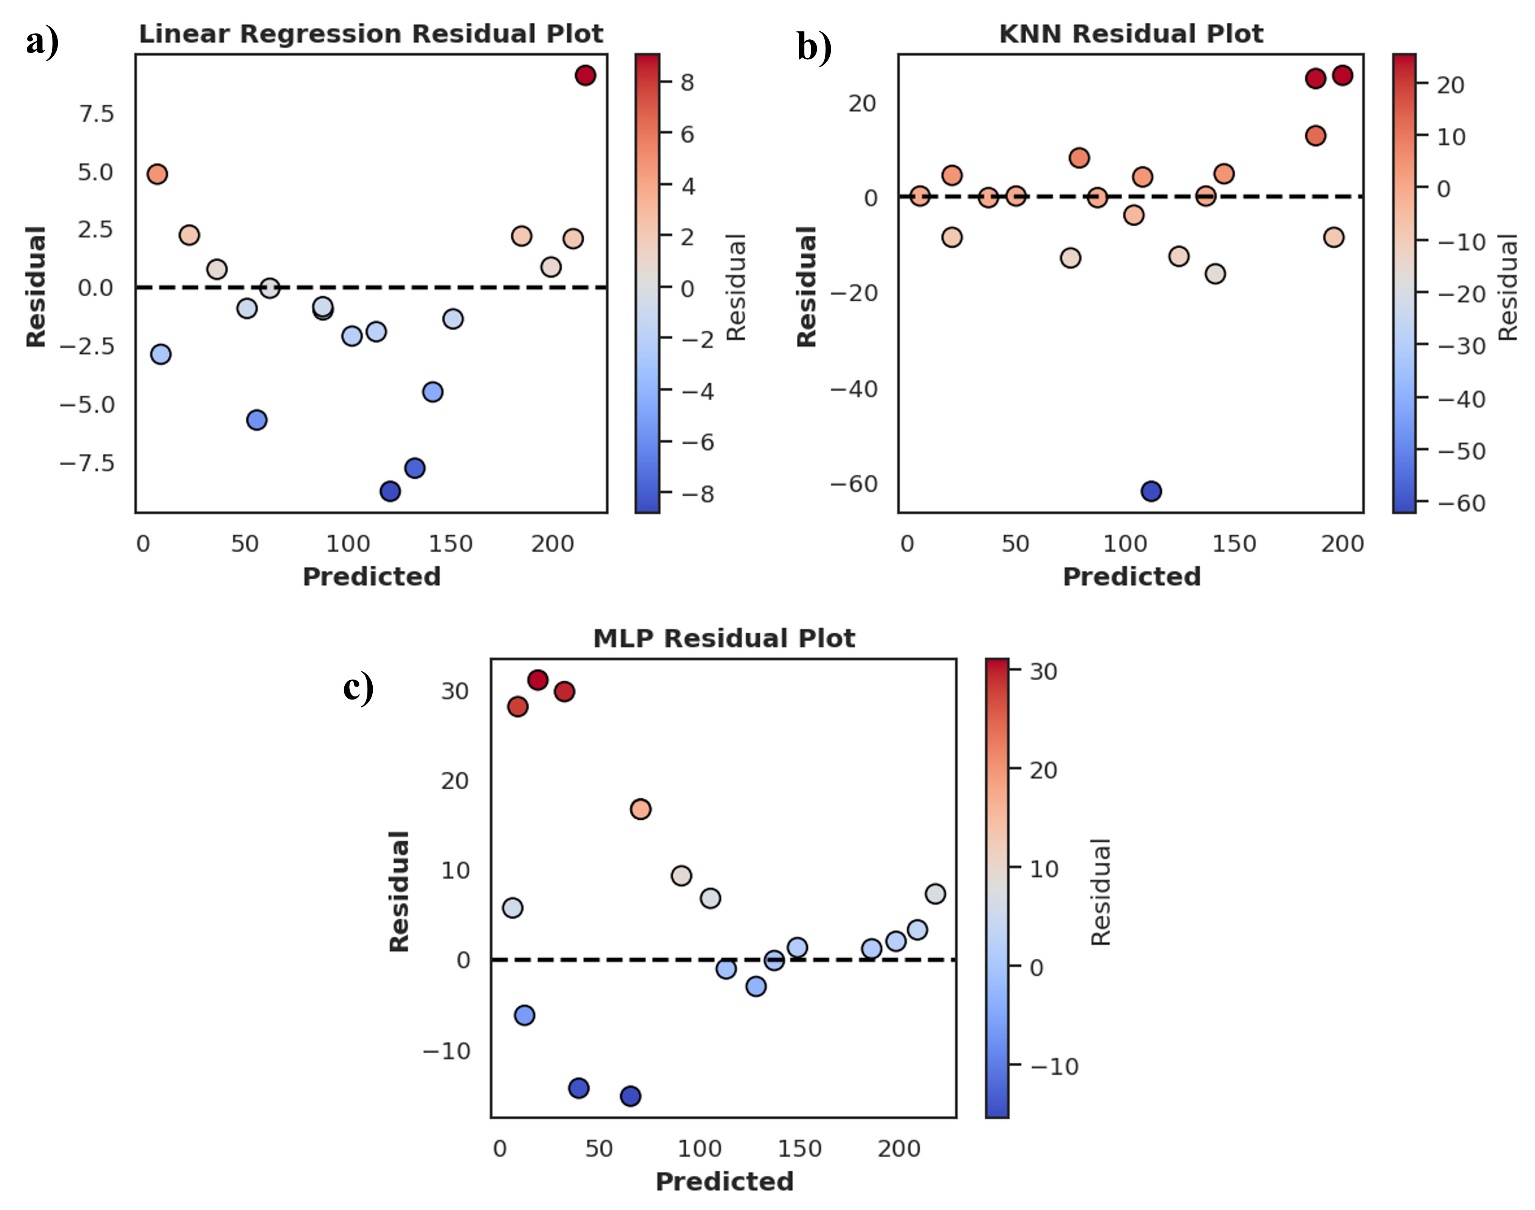


**Figure. S18.** Residual plots for (a) Linear Regression, (b) Random Forest, (c) KNN, and (d) MLP models


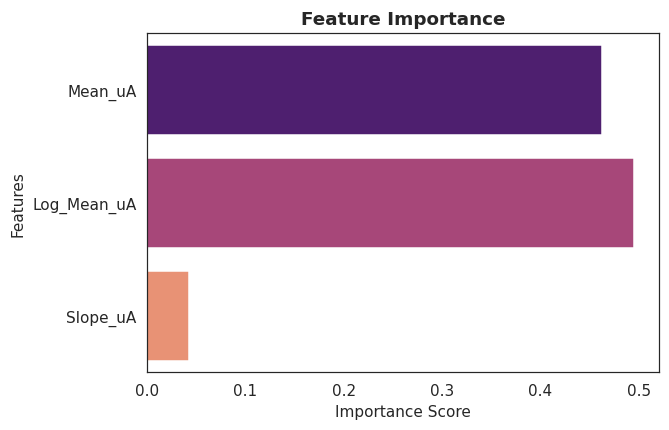


**Figure. S19.** Feature importance showing the contribution of electrochemical parameters to model prediction.

| Table S1. Comparison of electrochemical parameters of different modified electrodes | | | | |
| --- | --- | --- | --- | --- |
| Electrodes | **Rct (Ω)** | **Electron transfer rate (k°) constant (cm s-1)** | **Cathodic peak potential (Epc (V vs. Ag/AgCl))** | **ΔEp in mV** |
| Bare SPCE | 218 | 2.23 × 10-3 | -0.56 V | 262 |
| VSe2-SPCE | 332 | 3.39 × 10-3 | -0.63 V | 388 |
| MXene-SPCE | 159 | 4.65 × 10-3 | -0.47 V | 250 |
| VSe2-MXene-SPCE | 108 | 6.85 × 10-3 | -0.45 V | 205 |
| Au-VSe2-SPCE | 80 | 9.44 × 10-3 | -0.43 V | 178 |
| Au-MXene-SPCE | 60 | 1.26 × 10-2 | -0.42V | 169 |
| Au-VSe2-MXene-SPCE | 45 | 1.68 × 10-2 | -0.40 V | 150 |

| **Table S2. Performance comparison of Au-VSe2-MXene sensor and other electrodes in FZD detection** | | | | | |
| --- | --- | --- | --- | --- | --- |
| **Working electrode** | **Method** | **Linear range (µM)** | **LOD (nM)** | **Real sample** | **Refs.** |
| NiCo2O4/GCE | DPV | 0.01-150 | 29.13 | FZD tablets and Serum | [1] |
| LaV/F-BN/GCE | Amperometry | 0.015-300 | 3 | human serum, and human urine | [2] |
| Pt-Re NP/PAC/GCE | DPV | 0.2-117.7 | 20.8 | human blood serum and human urine | [3] |
| Fe/NiMOFs/CNTs/rGO/GCE | CA | 0.5 -250 | 80 | eggs, milk and lake water | [4] |
| ZrMOF/CNT/nanocellulose/GCE | SWV | 10 -140 | 1.37 | Honey, milk and Paraxin | [5] |
| Co-MOF@CB/GCE | DPV | 0.4-610 | 87.5 | Milk, Honey, and Chicken | [6] |
| NFO/N-CNTs/GCE | Amperometry | 0.0025-152.76 | 8 | veterinary feed, human urine | [7] |
| GM-P/GCE | DPV | 0.2-78.2 | 0.27 | Piped water and River water | [8] |
| CuS-rGO/g-C3N4/GCE | DPV | 0.1-336.4 | 10.8 | Lake water | [9] |
| Au-VSe2-MXene-SPCE | Amperometry | 6.0-225 | 0.21 | Hospital wastewater, pond water, river water, and lake water | This work |
| Fe/Ni-MOFs/CNTs/rGO/GCE = iron/nickel metal-organic framework/carbon nanotubes/reduced graphene oxide glassy carbon electrode; .ZrMOF/CNT/nanocellulose = zirconium-based metal–organic frameworks (Zr-MOFs), carbon nanotubes (CNTs), and nanocellulose; LaV/F-BN= lanthanum vanadate/functionalized boron nitride; Co-MOF@CB = cobalt-based metal-organic framework (Co-MOF) and carbon black; NFO/N-CNTs= NdFeO3 nanoparticles decorated on porous nitrogen-doped carbon nanotubes; Pt-Re NP/PAC = platinum–rhenium nanoparticles decorated on a porous activated carbon; GM-P = poly(diallyldimethyl-ammonium chloride) (PDDA) assembled GO and MXene composite | | | | | |

| **Table S3. Determination of FZD in actual samples using Au-VSe2-MXene sensor** | | | | | |
| --- | --- | --- | --- | --- | --- |
| **Real sample** | **Spiked (nM)** | **Found (nM)** | **Recovery (%)** | **RSD (%)** | **Average recovery (%)** |
| **Hospital wastewater** | 12 | 12.48 | 100.0 | 2.4 | 99.9 |
| 24 | 26.21 | 95.36 | 3.8 |  |
| 37 | 36.62 | 102.39 | 3.2 |  |
| 49 | 47.77 | 104.65 | 4.6 |  |
| 62 | 64.13 | 97.45 | 2.2 |  |
| **Pond water** | 12 | 11.55 | 108.2 | 3.8 | 101.37 |
| 24 | 24.13 | 103.56 | 4.2 |  |
| 37 | 40.25 | 93.14 | 3.4 |  |
| 49 | 50.41 | 99.19 | 3.6 |  |
| 62 | 60.81 | 102.78 | 2.8 |  |
| **River water** | 12 | 11.72 | 98.21 | 4.8 | 100.8 |
| 24 | 23.76 | 105.2 | 2.6 |  |
| 37 | 36.84 | 101.8 | 3.2 |  |
| 49 | 50.12 | 99.7 | 4.2 |  |
| 62 | 63.01 | 99.2 | 3.8 |  |

| Table S4. Determination of FZD in actual samples using Au-VSe2-MXene composites modified SPCE. | | | | | |
| --- | --- | --- | --- | --- | --- |
| Real sample | **Spiked (nM)** | **Found (nM)** | **Recovery (%)** | **RSD (%)** | **Average recovery (%)** |
| lake water | 12 | 12.26 | 102.12 | 3.6 | 101.6 |
|  | 24 | 24.18 | 103.3 | 3.2 |  |
|  | 37 | 37.36 | 100.3 | 1.8 |  |
|  | 49 | 49.17 | 101.6 | 1.4 |  |
|  | 62 | 62.22 | 100.4 | 4.2 |  |

| **Table S5. Evaluation of regression-based ML models for electrochemical FZD detection** | | | |
| --- | --- | --- | --- |
| **Model** | **RMSE** | **MAE** | **Test R²** |
| Linear Regression | 4.1757 | 3.1488 | 0.9960 |
| Random Forest | 1.0725 | 0.6105 | 0.9997 |
| KNN | 17.9735 | 11.0351 | 0.9262 |
| MLP | 14.3550 | 10.4705 | 0.9529 |

| **Table S6. Optimized hyperparameters of Various ML Models** | | |
| --- | --- | --- |
| **Model** | **Hyperparameter** | **Optimized Value** |
| Random Forest | n_estimators | 50 |
| max_depth | 5 |
| KNN | n_neighbors | 3 |
| MLP | hidden_layer_sizes | 100 |
| alpha | 0.0001 |
| Linear Regression | – | Default |

References

1. Liu R, Wu B, Xu C, Zhang C, Han M, Zhao M, et al. Ultrasonically assisted synthesis of Co-Ni bimetallic oxides for simultaneous detection of furazolidone and metronidazole. Ultrasonics Sonochemistry. 2025;120:107433. doi: <https://doi.org/10.1016/j.ultsonch.2025.107433>.

2. Kokulnathan T, Almutairi G, Chen S-M, Chen T-W, Ahmed F, Arshi N, et al. Construction of Lanthanum Vanadate/Functionalized Boron Nitride Nanocomposite: The Electrochemical Sensor for Monitoring of Furazolidone. ACS Sustainable Chemistry & Engineering. 2021;9(7):2784-94. doi: 10.1021/acssuschemeng.0c08340.

3. Veerakumar P, Sangili A, Chen S-M, Pandikumar A, Lin K-C. Fabrication of Platinum–Rhenium Nanoparticle-Decorated Porous Carbons: Voltammetric Sensing of Furazolidone. ACS Sustainable Chemistry & Engineering. 2020;8(9):3591-605. doi: 10.1021/acssuschemeng.9b06058.

4. Pan Y, Zhang T, Jin Y, Li S, Hu J, Li L. Rapid and selective detection of furazolidone, chloramphenicol and dimetridazole using a multi-dimensional heterojunction electrochemical sensor. Microchemical Journal. 2025;219:115807. doi: <https://doi.org/10.1016/j.microc.2025.115807>.

5. K. J.  A, Reddy S, Swamy BEK, M P, B. S.  M, Muralidhara HB. A Hybrid Zr-MOF/CNT/Nanocellulose Electrochemical Sensor for Dual Detection of Furazolidone and Chloramphenicol in Food Samples. ACS Applied Nano Materials. 2025;8(41):19968-82. doi: 10.1021/acsanm.5c03653.

6. Selvam A, Gopika MG, Kuo C-Y, Saraswathyamma B, Yusuf K, Govindasamy M. Co-MOF-67/carbon black composite: A novel electrochemical platform for furazolidone detection for food analysis. Food Chemistry. 2025;489:145023. doi: <https://doi.org/10.1016/j.foodchem.2025.145023>.

7. Pandiyan R, Vinothkumar V, Chen S-M, Veerakumar P, Kim TH. Polyol-assisted synthesis of NdFeO3 nanoparticles decorated porous N-CNTs for voltammetric sensing of furazolidone in veterinary feeds and urine samples. Surfaces and Interfaces. 2024;49:104365. doi: <https://doi.org/10.1016/j.surfin.2024.104365>.

8. Wei K, Pan K, Qu G, Qin J, Lv J, Liang Y. Self-assembly of GO-MXene hybrid composites by polyelectrolyte: As an efficient electrocatalyst for selective electrochemical detection of the antibiotic furazolidone. Journal of Environmental Chemical Engineering. 2024;12(2):112319. doi: <https://doi.org/10.1016/j.jece.2024.112319>.

9. Bhuvaneswari C, Ganesh Babu S. Nanoarchitecture and surface engineering strategy for the construction of 3D hierarchical CuS-rGO/g-C3N4 nanostructure: An ultrasensitive and highly selective electrochemical sensor for the detection of furazolidone drug. Journal of Electroanalytical Chemistry. 2022;907:116080. doi: <https://doi.org/10.1016/j.jelechem.2022.116080>.
